# Supplementary material for: Horizontal Gene Transfer of Fluoroquinolone Resistance-Conferring Genes From Commensal Neisseria to Neisseria gonorrhoeae: A Global Phylogenetic Analysis of 20,047 Isolates
Source: PubMed Central journal article supplement (PMC8973304; doi:10.3389/fmicb.2022.793612), 2022-03-17
Supplement: Presentation_2.pdf [file Presentation_2.pdf]

1.420 1.440 1.460 1.480 1.500 1.520 1.540

gyrA\_allele-270 TGCTATTTTACGCATGAGCCTGCGAAACCTGACCGGCCTCGATCGGAAAGAAATTTCGAAAGCTACAAAAACCTGATGGTAAATCATCGACTTTGTGGATATCCTCTCCAAACCCGAAACGCATTACCCAAATCATCC 1540

gyrA\_allele-93 TGCTATTTTACGCATGAGCCTGCGAAACCTGACCGGCCTCGATCAGAAAGAAATTATCGAAAGCTACAAAAACCTGATGGTAAATCATCGACTTTGTGGATATCCTCTCCAAACCCGAAACGCATTACCCAAATCATCC 1540

gyrA\_allele-496 TGCTATTTTACGCATGAGCCTGCGAAACCTGACCGGCCTCGATCAGAAAGAAATTATCGAAAGCTACAAAAACCTGATGGTAAATCATCGACTTTGTGGATATCCTCTCCAAACCCGAAACGCATTACCCAAATCATCC 1540

gyrA\_allele-488 TGCTATTTTACGCATGAGCCTGCGAAACCTGACCGGCCTCGATCAGAAAGAAATTATCGAAAGCTACAAAAACCTGATGGTAAATCATCGACTTTGTGGATATCCTCTCCAAACCCGAAACGCATTACCCAAATCATCC 1540

gyrA\_allele-491 TGCTATTTTACGCATGAGCCTGCGAAACCTGACCGGCCTCGATCAGAAAGAAATTATCGAAAGCTACAAAAACCTGATGGTAAATCATCGACTTTGTGGATATCCTCTCCAAACCCGAAACGCATTACCCAAATCATCC 1540

gyrA\_allele-508 TGCTATTTTACGCATGAGCCTGCGAAACCTGACCGGCCTCGATCAGAAAGAAATTATCGAAAGCTACAAAAACCTGATGGTAAATCATCGACTTTGTGGATATCCTCTCCAAACCCGAAACGCATTACCCAAATCATCC 1540

FA1090\_gyrA\_allele-1 TGCTATTTTACGCATGAGCCTGCGAAACCTGACCGGCCTCGATCAGAAAGAAATTATCGAAAGCTACAAAAACCTGATGGTAAATCATCGACTTTGTGGATATCCTCTCCAAACCCGAAACGCATTACCCAAATCATCC 1540  
Sequence logo **TGCTATTTTACGCATGAGCCTGCGAAACCTGACCGGCCTCGATCAGAAAGAAATTATCGAAAGCTACAAAAACCTGATGGTAAATCATCGACTTTGTGGATATCCTCTCCAAACCCGAAACGCATTACCCAAATCATCC**

1.560 1.580 1.600 1.620 1.640 1.660 1.680

gyrA\_allele-270 GGACGAACTGGAAGAAATCAAACAACCTATGCGGACGAAAGCCGACGAAATCAACCCGTTGCGCGGCACATTGCCGATGAAGACCTGATTCGCACACGCGAAATGGTGGTACCCCTGACCCACGGCGGCTATATA 1680

gyrA\_allele-93 GTGACGAACTGGAAGAAATCAAACAACCTATGCGGACGAAAGCCGACGAAATCAACCCGTTGCGCGGCACATTGCCGATGAAGACCTGATTCGCACACGCGAAATGGTGGTACCCCTGACCCACGGCGGCTATATA 1680

gyrA\_allele-496 GTGACGAACTGGAAGAAATCAAACAACCTATGCGGACGAAAGCCGACGAAATCAACCCGTTGCGCGGCACATTGCCGATGAAGACCTGATTCGCACACGCGAAATGGTGGTACCCCTGACCCACGGCGGCTATATA 1680

gyrA\_allele-488 GTGACGAACTGGAAGAAATCAAACAACCTATGCGGACGAAAGCCGACGAAATCAACCCGTTGCGCGGCACATTGCCGATGAAGACCTGATTCGCACACGCGAAATGGTGGTACCCCTGACCCACGGCGGCTATATA 1680

gyrA\_allele-491 GTGACGAACTGGAAGAAATCAAACAACCTATGCGGACGAAAGCCGACGAAATCAACCCGTTGCGCGGCACATTGCCGATGAAGACCTGATTCGCACACGCGAAATGGTGGTACCCCTGACCCACGGCGGCTATATA 1680

gyrA\_allele-508 GTGACGAACTGGAAGAAATCAAACAACCTATGCGGACGAAAGCCGACGAAATCAACCCGTTGCGCGGCACATTGCCGATGAAGACCTGATTCGCACACGCGAAATGGTGGTACCCCTGACCCACGGCGGCTATATA 1680

FA1090\_gyrA\_allele-1 GTGACGAACTGGAAGAAATCAAACAACCTATGCGGACGAAAGCCGACGAAATCAACCCGTTGCGCGGCACATTGCCGATGAAGACCTGATTCGCACACGCGAAATGGTGGTACCCCTGACCCACGGCGGCTATATA 1680  
Sequence logo **GTCACGAACTGGAAGAAATCAAACAACCTATGCGGACGAAAGCCGACGAAATCAACCCGTTGCGCGGCACATTGCCGATGAAGACCTGATTCGCACACGCGAAATGGTGGTACCCCTGACCCACGGCGGCTATATA**

1.700 1.720 1.740 1.760 1.780 1.800 1.820

gyrA\_allele-270 AAAACCCAGCCGACCAACCGACTATCAGGCTCAGCGTCGCGGGGGCGCGCAACAGGGCGGCTGCCACCAAGAGCAAGACTTTATCGAAACCCCTGTTGTTGCCAACACGCAATGATGATGTTTTACCAACCT 1820

gyrA\_allele-93 AAAACCCAGCCGACCAACCGACTATCAGGCTCAGCGTCGCGGGGGCGCGCAACAGGGCGGCTGCCACCAAGAGCAAGACTTTATCGAAACCCCTGTTGTTGCCAACACGCAATGATGATGTTTTACCAACCT 1820

gyrA\_allele-496 AAAACCCAGCCGACCAACCGACTATCAGGCTCAGCGTCGCGGGGGCGCGCAACAGGGCGGCTGCCACCAAGAGCAAGACTTTATCGAAACCCCTGTTGTTGCCAACACGCAATGATGATGTTTTACCAACCT 1820

gyrA\_allele-488 AAAACCCAGCCGACCAACCGACTATCAGGCTCAGCGTCGCGGGGGCGCGCAACAGGGCGGCTGCCACCAAGAGCAAGACTTTATCGAAACCCCTGTTGTTGCCAACACGCAATGATGATGTTTTACCAACCT 1820

gyrA\_allele-491 AAAACCCAGCCGACCAACCGACTATCAGGCTCAGCGTCGCGGGGGCGCGCAACAGGGCGGCTGCCACCAAGAGCAAGACTTTATCGAAACCCCTGTTGTTGCCAACACGCAATGATGATGTTTTACCAACCT 1820

gyrA\_allele-508 AAAACCCAGCCGACCAACCGACTATCAGGCTCAGCGTCGCGGGGGCGCGCAACAGGGCGGCTGCCACCAAGAGCAAGACTTTATCGAAACCCCTGTTGTTGCCAACACGCAATGATGATGTTTTACCAACCT 1820

FA1090\_gyrA\_allele-1 AAAACCCAGCCGACCAACCGACTATCAGGCTCAGCGTCGCGGGGGCGCGCAACAGGGCGGCTGCCACCAAGAGCAAGACTTTATCGAAACCCCTGTTGTTGCCAACACGCAATGATGATGTTTTACCAACCT 1820  
Sequence logo **AAAACCCAGCCGACCAACCGACTATCAGGCTCAGCGTCGCGGGGGCGCGCAACAGGGCGGCTGCCACCAAGAGCAAGACTTTATCGAAACCCCTGTTGTTGCCAACACGCAATGATGATGTTTTACCAACCT**

1.840 1.860 1.880 1.900 1.920 1.940 1.960

gyrA\_allele-270 CGGCAAGTGCCACTGGATTAAAGTTTACAAACTGCCGAAGGCGGACGCAACAGCGCGGCGCTCCGATTAAACAACGTATCCAGTGGAAAGAGGCGAAAAGTCAAGCGGATTCGGCAGTACGCGAGTTCCCGAAG 1960

gyrA\_allele-93 CGGCAAGTGCCACTGGATTAAAGTTTACAAACTGCCGAAGGCGGACGCAACAGCGCGGCGCTCCGATTAAACAACGTATCCAGTGGAAAGAGGCGAAAAGTCAAGCGGATTCGGCAGTACGCGAGTTCCCGAAG 1960

gyrA\_allele-496 CGGCAAGTGCCACTGGATTAAAGTTTACAAACTGCCGAAGGCGGACGCAACAGCGCGGCGCTCCGATTAAACAACGTATCCAGTGGAAAGAGGCGAAAAGTCAAGCGGATTCGGCAGTACGCGAGTTCCCGAAG 1960

gyrA\_allele-488 CGGCAAGTGCCACTGGATTAAAGTTTACAAACTGCCGAAGGCGGACGCAACAGCGCGGCGCTCCGATTAAACAACGTATCCAGTGGAAAGAGGCGAAAAGTCAAGCGGATTCGGCAGTACGCGAGTTCCCGAAG 1960

gyrA\_allele-491 CGGCAAGTGCCACTGGATTAAAGTTTACAAACTGCCGAAGGCGGACGCAACAGCGCGGCGCTCCGATTAAACAACGTATCCAGTGGAAAGAGGCGAAAAGTCAAGCGGATTCGGCAGTACGCGAGTTCCCGAAG 1960

gyrA\_allele-508 CGGCAAGTGCCACTGGATTAAAGTTTACAAACTGCCGAAGGCGGACGCAACAGCGCGGCGCTCCGATTAAACAACGTATCCAGTGGAAAGAGGCGAAAAGTCAAGCGGATTCGGCAGTACGCGAGTTCCCGAAG 1960

FA1090\_gyrA\_allele-1 CGGCAAGTGCCACTGGATTAAAGTTTACAAACTGCCGAAGGCGGACGCAACAGCGCGGCGCTCCGATTAAACAACGTATCCAGTGGAAAGAGGCGAAAAGTCAAGCGGATTCGGCAGTACGCGAGTTCCCGAAG 1960  
Sequence logo **CGGCAAGTGCCACTGGATTAAAGTTTACAAACTGCCGAAGGCGGACGCAACAGCGCGGCGCTCCGATTAAACAACGTATCCAGTGGAAAGAGGCGAAAAGTCAAGCGGATTCGGCAGTACGCGAGTTCCCGAAG**

1.980 2.000 2.020 2.040 2.060 2.080 2.100

gyrA\_allele-270 ACCAATACGTCTTCTTCCGCCACCGCGCAAGGATGGTGAAGAAAGTCCAACCTTCCGCTTTAAAAACGTCCGCGCCCAAGGCATTAAAGCCATCGCACTCAAAGAAGGCGACTACCTCGTCCGCGCTGCGCAAACAGGC 2100

gyrA\_allele-93 ACCAATACGTCTTCTTCCGCCACCGCGCAAGGATGGTGAAGAAAGTCCAACCTTCCGCTTTAAAAACGTCCGCGCCCAAGGCATTAAAGCCATCGCACTCAAAGAAGGCGACTACCTCGTCCGCGCTGCGCAAACAGGC 2100

gyrA\_allele-496 ACCAATACGTCTTCTTCCGCCACCGCGCAAGGATGGTGAAGAAAGTCCAACCTTCCGCTTTAAAAACGTCCGCGCCCAAGGCATTAAAGCCATCGCACTCAAAGAAGGCGACTACCTCGTCCGCGCTGCGCAAACAGGC 2100

gyrA\_allele-488 ACCAATACGTCTTCTTCCGCCACCGCGCAAGGATGGTGAAGAAAGTCCAACCTTCCGCTTTAAAAACGTCCGCGCCCAAGGCATTAAAGCCATCGCACTCAAAGAAGGCGACTACCTCGTCCGCGCTGCGCAAACAGGC 2100

gyrA\_allele-491 ACCAATACGTCTTCTTCCGCCACCGCGCAAGGATGGTGAAGAAAGTCCAACCTTCCGCTTTAAAAACGTCCGCGCCCAAGGCATTAAAGCCATCGCACTCAAAGAAGGCGACTACCTCGTCCGCGCTGCGCAAACAGGC 2100

gyrA\_allele-508 ACCAATACGTCTTCTTCCGCCACCGCGCAAGGATGGTGAAGAAAGTCCAACCTTCCGCTTTAAAAACGTCCGCGCCCAAGGCATTAAAGCCATCGCACTCAAAGAAGGCGACTACCTCGTCCGCGCTGCGCAAACAGGC 2100

FA1090\_gyrA\_allele-1 ACCAATACGTCTTCTTCCGCCACCGCGCAAGGATGGTGAAGAAAGTCCAACCTTCCGCTTTAAAAACGTCCGCGCCCAAGGCATTAAAGCCATCGCACTCAAAGAAGGCGACTACCTCGTCCGCGCTGCGCAAACAGGC 2100  
Sequence logo **ACCAATACGTCTTCTTCCGCCACCGCGCAAGGATGGTGAAGAAAGTCCAACCTTCCGCTTTAAAAACGTCCGCGCCCAAGGCATTAAAGCCATCGCACTCAAAGAAGGCGACTACCTCGTCCGCGCTGCGCAAACAGGC**
